# Supplementary material
Source: PubMed Central journal article supplement (PMC2928709)
Supplement: Supp_Data_1.pdf [file Supp_Data_1.pdf]

**SUPPLEMENTAL ONLINE DATA S1.** Characterization of adipose stem cells (ASCs). Surface marker expression of undifferentiated ASCs analyzed by flow cytometric analysis of 10,000 cells. Data are presented as mean  $\pm$  standard deviation obtained from the number of donors indicated in parentheses.

| <i>Surface Protein</i> | <i>Antigen</i>                           | <i>Manufacturer</i> | <i>Fetal bovine serum (n=15)</i> | <i>Human serum (n=15)</i> |
|------------------------|------------------------------------------|---------------------|----------------------------------|---------------------------|
| CD9                    | Tetraspanin receptor                     | BD                  | 16.8 $\pm$ 9.9                   | 12.9 $\pm$ 11.3           |
| CD10                   | CALLA                                    | BD                  | 75.8 $\pm$ 16.9                  | 76.8 $\pm$ 19.6           |
| CD13                   | Aminopeptidase N                         | BD                  | 99.6 $\pm$ 0.7                   | 99.5 $\pm$ 0.7            |
| CD29                   | Integrin $\beta$ 1                       | BD                  | 98.1 $\pm$ 3.2                   | 97.4 $\pm$ 2.9            |
| CD31                   | PECAM                                    | IT                  | 0.5 $\pm$ 0.5                    | 0.5 $\pm$ 0.5             |
| CD34                   | Sialomucin-like adhesion molecule        | IT                  | 20.4 $\pm$ 27.5                  | 10.8 $\pm$ 20.2           |
| CD44                   | Hyaluronate, HCAM                        | IT                  | 81.7 $\pm$ 17.7                  | 77.1 $\pm$ 24.7           |
| CD45                   | Leukocyte common antigen                 | MB                  | 0.6 $\pm$ 0.5                    | 0.5 $\pm$ 0.3             |
| CD49d                  | Integrin $\alpha$ 2, VLA-4               | BD                  | 25.6 $\pm$ 13.6                  | 32.0 $\pm$ 25.0           |
| CD90                   | Thy-1                                    | BD                  | 99.0 $\pm$ 1.2                   | 99.1 $\pm$ 1.1            |
| CD105                  | SH-2, endoglin                           | RD                  | 94.5 $\pm$ 5.9                   | 87.9 $\pm$ 10.1           |
| CD106                  | VCAM-1                                   | BD                  | 0.8 $\pm$ 1.0                    | 0.8 $\pm$ 0.7             |
| CD166                  | ALCAM                                    | BD                  | 29.7 $\pm$ 21.2                  | 32.9 $\pm$ 29.8           |
| HLA-ABC                | Major histocompatibility class I antigen | IT                  | 11.5 $\pm$ 9.0                   | 18.0 $\pm$ 14.7           |
|                        | Fibroblast surface protein               | Sigma               | 8.6 $\pm$ 10.7                   | 6.4 $\pm$ 10.4            |
|                        | STRO-1                                   | RD                  | 3.2 $\pm$ 2.7                    | 3.6 $\pm$ 5.9             |

CALLA, common leukocyte lymphocytic leukemia antigen; PECAM, platelet endothelial cell adhesion molecule; HCAM, lymphocyte homing-associated cell adhesion molecule; VCAM, vascular cell adhesion molecule; ALCAM, activated leukocyte cell adhesion molecule; Thy-1, T cell surface glycoprotein; STRO-1, putative mesenchymal stem cell marker

BD, BDBiosciences, Erembodegem, Belgium; IT, Immunotools GmbH Friesoythe, Germany; RD, R&D Systems Inc, MN, USA; MB, Miltenyi Biotech, Bergisch Gladbach, Germany; Sigma, Sigma, St. Louis, MO, USA

*Characterization of ASCs.* Relative cell number (y-axis) and fluorescence intensity (x-axis). Unstained control cells (empty histograms) and cells stained with antibodies against the surface proteins (filled histograms).

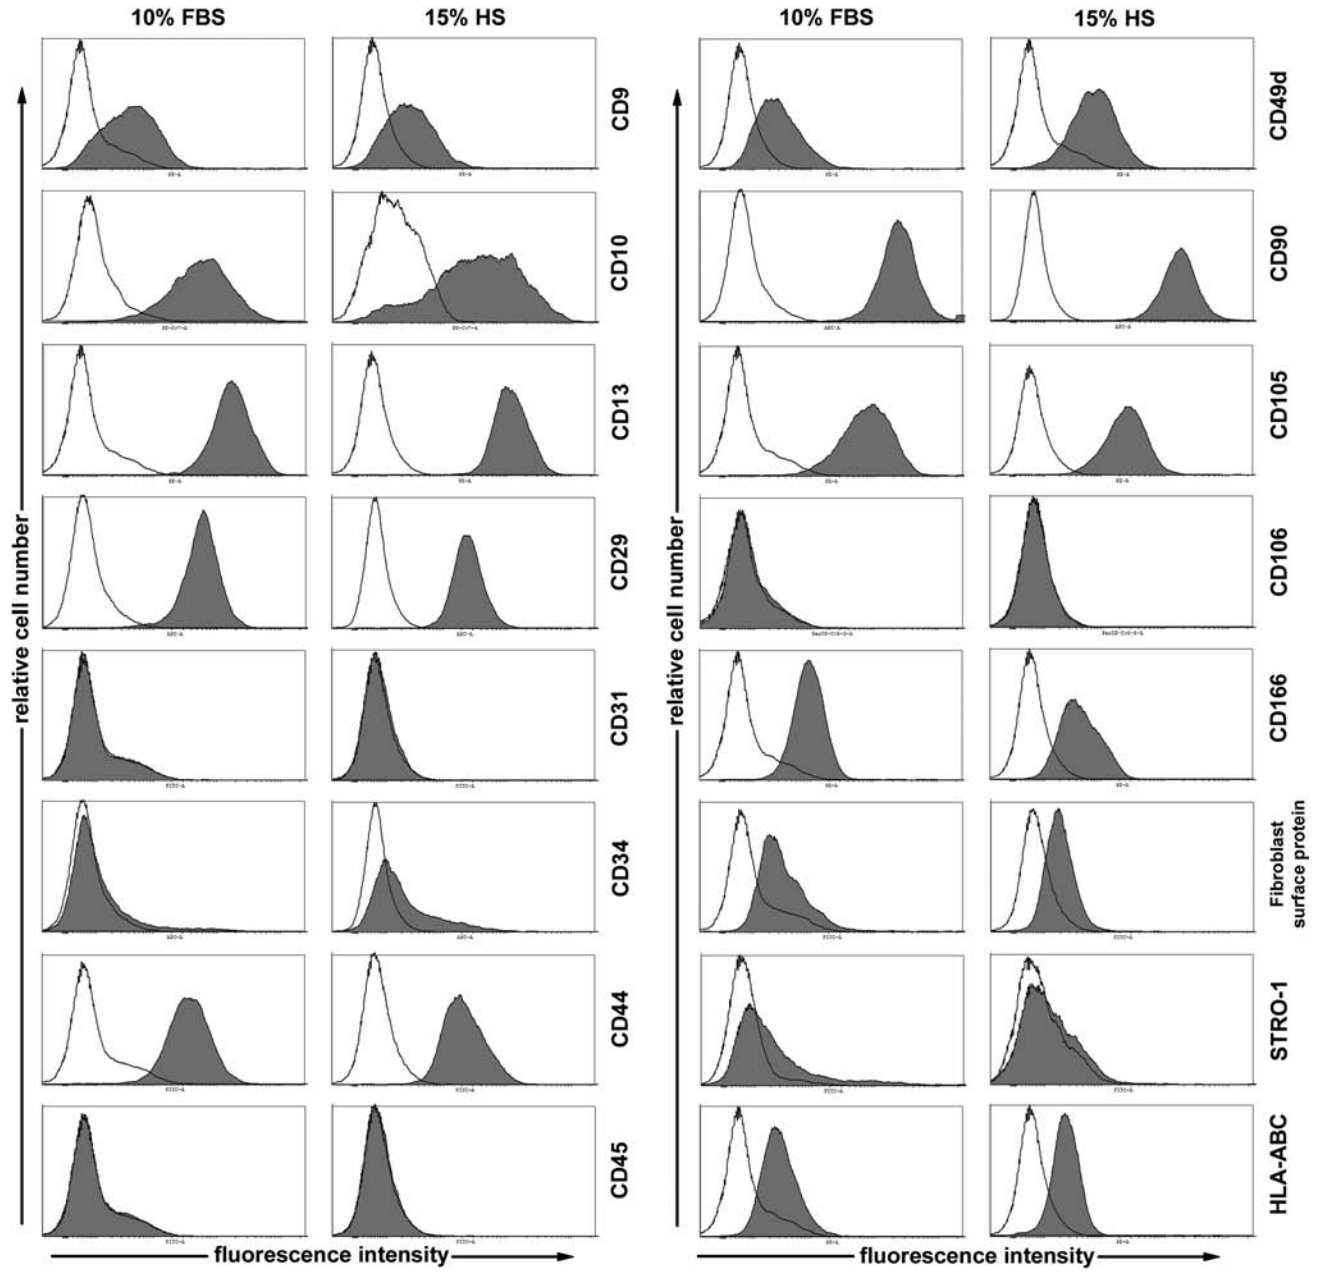

**SUPPLEMENTAL ONLINE DATA S2.** Microarray data quality control 1. To control data quality, RNA degradation plots were produced of the raw data and ensured to have resembling slopes and profiles (**A**). To verify adequate normalization, the comparability of the density histograms and box plots (**B, C**) of all samples and the linearity of the MA plot, a plot of log-intensity ratios (*M*) versus log-intensity averages (*A*), of each donor (human serum [HS] vs. fetal bovine serum [FBS]) were ensured. The average MA plot across all donors is presented (**D**). Microarray data quality control 2. To control data quality, a QC Report was produced. The QC Report assesses overall signal quality, 3':5' ratios of spiked-in and control genes, percentages of present calls, background levels, hybridization and gridding problems, background fluctuations, and outlier samples.<sup>60</sup> The approaches demonstrated good data quality across all samples.

**SUPPLEMENTAL VIDEOS S3 A AND B.** Automated monitoring of ASCs. The growth and morphologic characteristics of ASCs cultured in either 10% FBS (**A**) or 15% allogeneic human serum (alloHS) (**B**) were monitored using an online cell culture platform<sup>104,105</sup> (Cell-IQ<sup>®</sup>; Chip-man Technologies). This software allows time-lapse imaging of 500×670 μm areas in the culture wells. The video material was produced from the 2×2 time-lapse images (size, 1000×1340 μm) of a 3-day monitoring period, with time-lapse images captured approximately every 15 min.

**SUPPLEMENTAL ONLINE DATA S4.** Genes overexpressed and underexpressed in ASCs expanded in alloHS as compared to FBS.

**SUPPLEMENTAL ONLINE DATA S5.** Significantly enriched Gene Ontology (GO) Biological Processes and Kyoto Encyclopedia of Genes and Genomes (KEGG) pathways.

**SUPPLEMENTAL ONLINE DATA S6.** Differentially expressed genes on the human KEGG Cell cycle and transforming growth factor beta (TGF-β) signaling pathways.
